# Supplementary material for: Aptabody–aptatope interactions in aptablotting assays
Source: Royal Society of Chemistry journal article supplement (doi:10.1039/c7nr01827d), 2017-01-01
Supplement: c7nr01827d1.pdf [file c7nr01827d1.pdf]

1 **[Supplementary information]**

2 **Aptabody-Aptatope Interactions in Aptablotting Assays**

3 Running head: Aptabody-Aptatope Interactions

4  
5 **Hyun-Ju Um<sup>1†</sup>, Simranjeet Singh Sekhon<sup>1†</sup>, Woo-Ri Shin<sup>1†</sup>, Sang-Hee Lee<sup>1</sup>,**  
6 **Jiho Min<sup>2\*</sup>, Ji-Young Ahn<sup>1\*</sup>, and Yang-Hoon Kim<sup>1\*</sup>**

7  
8 <sup>1</sup>School of Biological Sciences, Chungbuk National University, 1 Chungdae-Ro,  
9 Seowon-Gu, Cheongju 28644, South Korea

10  
11 <sup>2</sup>Department of Bioprocess Engineering, Chonbuk National University,  
12 567 Baekje-daero, Deokjin-Gu Jeonju 54896, South Korea

13  
14  
15 **\*Corresponding author:**  
16 (Phone) +82-43-261-3575  
17 (Fax) +82-43-264-9600  
18 (E-mail) kyh@chungbuk.ac.kr

19  
20 **\*Co-corresponding author:**  
21 (Phone) +82-63-270-2436  
22 (Fax) +82-63-270-2306  
23 (E-mail) jyahn@ chungbuk.ac.kr

24  
25 **\* Co-Corresponding Author:**  
26 (Phone) +82-63-270-2436  
27 (Fax) +82-63-270-2306  
28 (E-mail) jihomin@jbnu.ac.kr

29  
30  
31 <sup>†</sup>These authors contributed equally to this work.

32  
33  
34 \*Correspondence should be addressed to Yang-Hoon Kim kyh@chungbuk.ac.kr or  
35 Ji-Young Ahn jyahn@ chungbuk.ac.kr or Jiho Min jihomin@jbnu.ac.kr

36  
37  
38 **Manuscript submitted to *Nanoscale***

## Figures

### Supplementary Figure S1

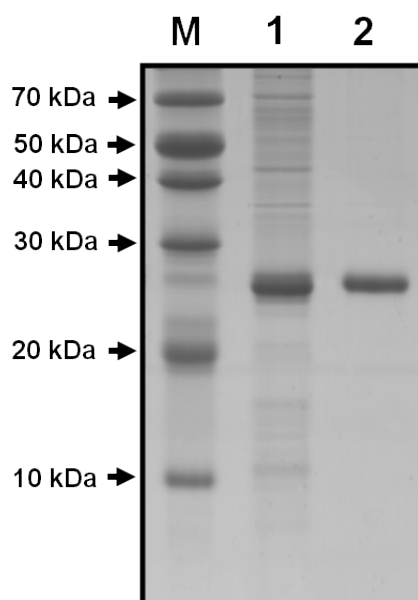

#### **GST overproduction and purification**

GST overexpression was successfully accomplished in *E. coli* with the pGEX4T-1 system.

The GST of *E. coli* was stably overexpressed as a soluble protein in *E. coli* BL21 (DE3). The GST protein was purified using glutathione-agarose beads, and the purified GST showed a single protein band with an apparent  $M_r$  of approximately 26000 on the SDS-PAGE stained with Coomassie blue. Lane 1, whole-cell lysates of pGETX4T-1 (10  $\mu$ g of protein); lane 2, purified GST (1  $\mu$ g of protein); M, molecular size markers.

## Supplementary Figure S2

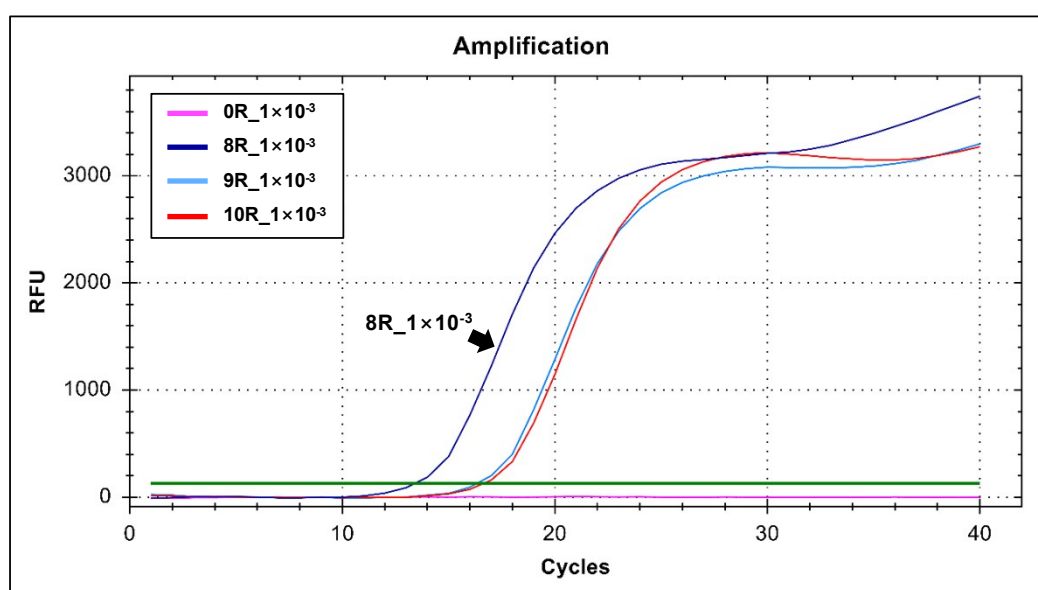

| Round         | 0 Round            | 8 Round            | 9 Round            | 10 Round           |
|---------------|--------------------|--------------------|--------------------|--------------------|
| Dilution rate | 1×10 <sup>-3</sup> | 1×10 <sup>-3</sup> | 1×10 <sup>-3</sup> | 1×10 <sup>-3</sup> |
| Ct value      | -                  | 13.33              | 16.49              | 16.97              |
| Efficiency    | 90.38              | 83.90              | 80.06              | 74.39              |

### Real-time PCR and round selection

We employed the real-time PCR (RT-PCR) analysis that provided a valuable tool for validating the optimal round of ssDNA aptamer enrichment. The eluted ssDNA bound from 0, 8<sup>th</sup>, 9<sup>th</sup>, and 10<sup>th</sup> rounds were normalized with the same concentration and reintroduced to GST. The recovered DNA samples from 0, 8<sup>th</sup>, 9<sup>th</sup>, and 10<sup>th</sup> round were amplified using an optimized RT-PCR cycle and the fluorescence signal was monitored by MiniOpticon™ Real-time PCR fluorescence signal detection system (Bio-Rad, USA). PCR experiment was independently triplicated and data was analyzed to obtain the average C(t) values. The samples from 8<sup>th</sup> round SELEX showed a lower C(t), C(t)=13.33, as compared to other samples, C(t)=15.20 for 9<sup>th</sup> round and 16.97 for 10<sup>th</sup> round, indicating the presence of higher amounts of DNA aptamer for GST.

### Supplementary Figure S3

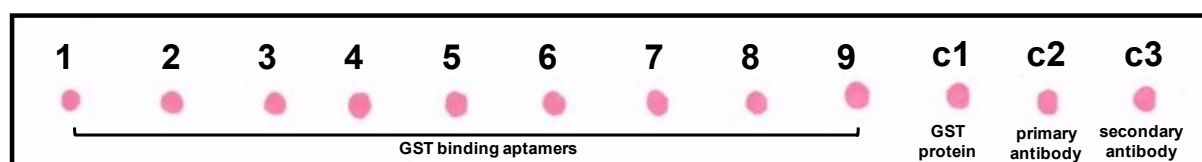

#### Dot-blotting analysis

Serial dilutions of purified GST (1  $\mu$ g to 1 ng) were spotted on the methanol-pretreated PVDF membranes. Blotted proteins are stained with Ponceau S solution (Sigma Aldrich, P7170).

## Supplementary Figure S4

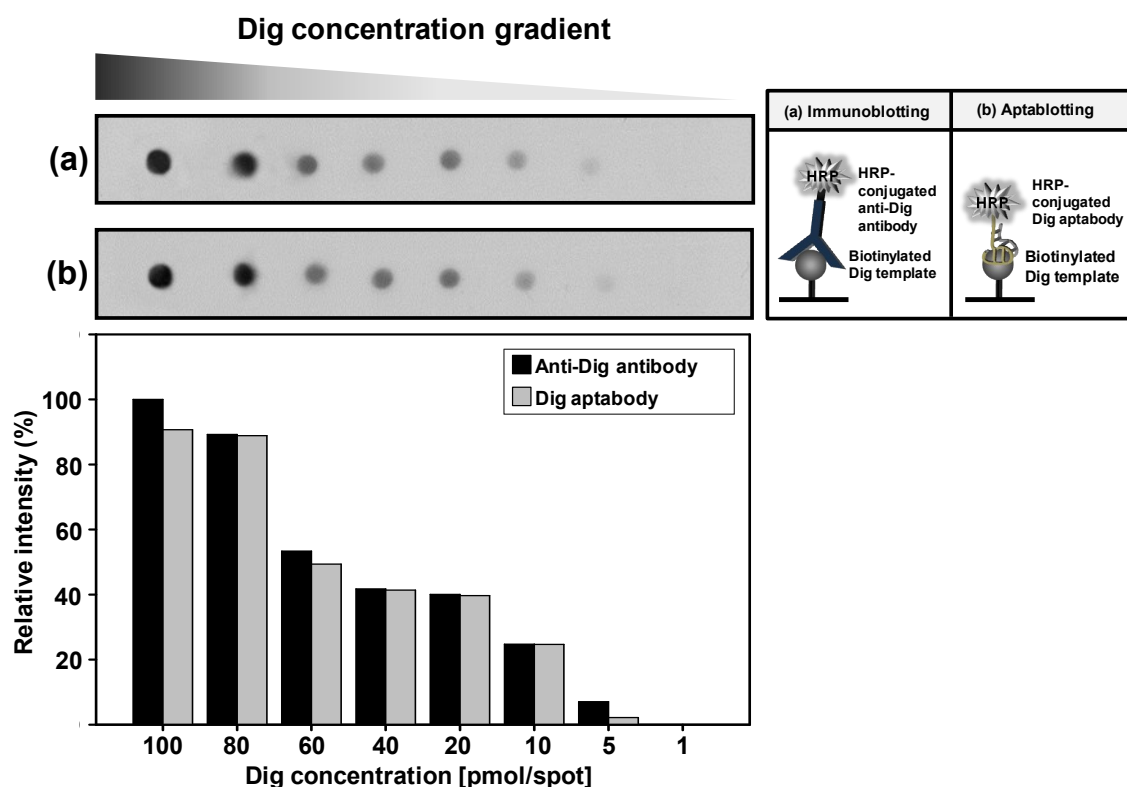

### DIG aptabody test

The synthesized DIG template (1  $\mu$ l/spot) was loaded onto the PVDF membrane in concentrations of 100 pmol, 80 pmol, 60 pmol, 40 pmol, 20 pmol, 10 pmol, 5 pmol, and 1 pmol. The membrane was then dried at 37  $^{\circ}$ C for 1 hr and immersed in 5% nonfat dry milk with PBST blocking buffer for 1 hr to block the non-specific binding sites. After washing three times for 5 min with a PBST washing buffer, the membranes were incubated with 1  $\mu$ g/ml diluted DIG-1-HRP and 1:5000 diluted anti-mouse DIG-HRP-conjugated antibodies (Abcam, UK). The binding sensitivity of the DIG aptabody and anti-DIG antibody was assessed via a comparison with the anti-DIG-HRP tests (a) immunoblotting and (b) aptablotting, respectively

### Supplementary Figure S5

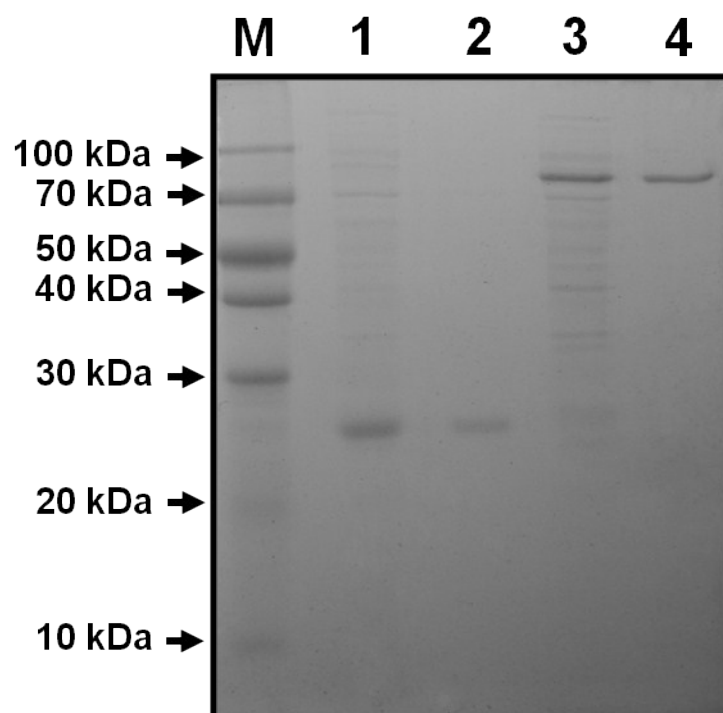

### GST and GST-fused protein overexpression and purification

The overexpression of GST and GST-fused PNBE proteins was successfully accomplished in *E. coli* with the pGEX4T-1 system. The GST and GST-fused PNBE protein of *E. coli* has been stably overexpressed as a soluble protein in *E. coli* BL21(DE3). The recombinants were purified with glutathione-agarose beads, and the purified GST and GST-fused PNBE showed a single protein band with an apparent  $M_r$  of approximately 26000 and 75000 via the SDS-PAGE analysis on a 12% gel stained with Coomassie Brilliant Blue. In the panels, lane 1 contains pGEX4T-1 whole-cell lysate (5 ug), lane 2 contains purified GST (0.5 ug), lane 3 contains pGEX4T-1::PNBE cell lysate (5 ug) and lane 4 contains purified GST-tagged PNBE protein (0.5 ug). The molecular size markers are shown in the lane labeled M.

**Table S1** Sequence and structure analysis of the GST aptabodies and DIG aptabodies used in this study.

| Clone | Selected sequences                           | $K_D$ (nM)        | Structures                                                                           |
|-------|----------------------------------------------|-------------------|--------------------------------------------------------------------------------------|
| GST-2 | CAGGGTTGGAGAGGTTTGGT<br>GGTTATCATAAGCGGTACAC | $0.002 \pm 0.003$ | 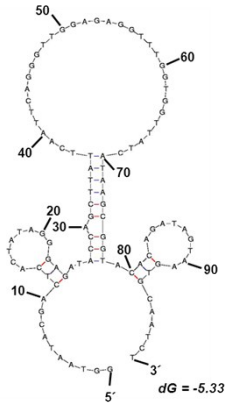  |
| DIG-1 | CGGTTGCTCCTGGTAGGTTA<br>CGACACGCGGGGCTGGCGGA | $0.007 \pm 0.001$ |  |

**Table S2** List of selected aptamers and target binding affinities of each aptamer as determined from the direct coupling SPR assay.

| Clone        | Selected sequences                              | Sequence size<br>(bp) | Identical<br>sequences | $K_D$ (nM)                          |
|--------------|-------------------------------------------------|-----------------------|------------------------|-------------------------------------|
| GST-1        | ACCGCTGCAATCGTGTGCCATACACAGATGATCCGCACA         | 39                    | 3                      | $0.019 \pm 0.028$                   |
| <b>GST-2</b> | <b>CAGGGTTGGAGAGGTTTGGTGGTTATCATAAGCGGTACAC</b> | <b>41</b>             | <b>2</b>               | <b><math>0.002 \pm 0.003</math></b> |
| GST-3        | TAGGTTTGGGTAGGTTGGAATGGTGAATAATATGGGACGG        | 40                    | 6                      | $0.015 \pm 0.016$                   |
| GST-4        | CGGACGTTGCACTGGAAAAGGAGGTTTGGTTCGGTTGGTC        | 40                    | 2                      | $0.119 \pm 0.151$                   |
| GST-5        | AGACAGCATAGCACTGTAACGATTGGTTTGGTGTGGTTGG        | 40                    | 8                      | $2.280 \pm 1.250$                   |
| GST-6        | AGATATCAGGAGCGGGGTTTGGGGTGGTTGGCGGTGGACG        | 40                    | 2                      | $95.110 \pm 15.35$                  |
| GST-7        | GCTCTAAGTATACCGGTAGGGTTGGCTGCGGTTTGGCTCG        | 40                    | 3                      | $0.014 \pm 0.011$                   |
| GST-8        | ACTATCGGATTTCTGGGTTTGGATCGGTTGGCAGCGAGTG        | 40                    | 2                      | $0.340 \pm 0.121$                   |
| GST-9        | GCTCTAAGTATTCCGGTAGGGTTGGCTGCGGTTTGGCTCA        | 40                    | 2                      | $8.37 \pm 1.250$                    |
| <b>DIG-1</b> | <b>CGGTTGCTCCTGGTAGGTTACGACACGCGGGGCTGGCGGA</b> | <b>39</b>             | <b>8</b>               | <b><math>0.007 \pm 0.001</math></b> |
| DIG-2        | ACCGTAACAGATAAAAAGATTCTGTGATTGACTGCTTCTGG       | 41                    | 2                      | $0.742 \pm 0.024$                   |
| DIG-3        | CGCCGGCTAGGAAACAATTGGTTGGTGTGTTTCGGCCCCCTT      | 40                    | 3                      | $0.030 \pm 0.001$                   |
| DIG-4        | CAGTGAAACTTTGGTTGGCCGCCTGTAGGGTCACTTTGTG        | 40                    | 1                      | $9.513 \pm 0.413$                   |



|        |                                           |    |   |                   |
|--------|-------------------------------------------|----|---|-------------------|
| DIG-5  | CCCCGCCAAGGTTTTTGCAGTTGGTCCCTCCGGTGATTCTG | 40 | 2 | $2.491 \pm 0.439$ |
| DIG-6  | CGCATTCGACATAGCCGGTAGTAAAAGCATGGTCGCTTCA  | 40 | 2 | $1.751 \pm 0.112$ |
| DIG-7  | CCAAAGTGGGATTTTTTAGTGGTTGCATCGCGAGACAGCT  | 40 | 2 | $1.035 \pm 0.457$ |
| DIG-8  | CGAGGTAGCAGGTTGCTTGCGGCTAAAGCATTTTCATGCT  | 40 | 2 | $1.442 \pm 0.318$ |
| DIG-9  | CACAAAGGAATGAACGATGCGATCTGGTAGCTTCTTTGGC  | 40 | 3 | $0.011 \pm 0.017$ |
| DIG-10 | CGTGGAATGTTGTTGCTTCTGCTACGATACGTCAACCCTC  | 40 | 1 | $1.775 \pm 0.571$ |
| DIG-11 | AGGTGTAGATACCCAGGCGTATGGTTGCGCTGTTTCGTGG  | 40 | 2 | $4.001 \pm 0.672$ |
| DIG-12 | CAAGGTGTCGCACTTTTTGACGTTGGACTGCTTCGAACAG  | 40 | 2 | $2.184 \pm 0.753$ |

---
